# Supplementary material for: Optical Genome Mapping as a Diagnostic Tool in Pediatric Acute Myeloid Leukemia
Source: MDPI journal article supplement (doi:10.3390/cancers14092058), 2022-04-19
Supplement: s1 [file s1]

**Table S1.** Rare translocation calls

| case # | translocation call    |
|--------|-----------------------|
| 6      | t(2;7)(q32.3;q21.11)  |
| 8      | t(10;12)(p12.1;q14.1) |
| 20     | t(4;10)(q26;p12.1)    |
