# Supplementary material for: Optical Genome Mapping as a Diagnostic Tool in Pediatric Acute Myeloid Leukemia
Source: MDPI journal article supplement (doi:10.3390/cancers14092058), 2022-04-19
Supplement: s1 [file s1]

**Table S3.** Primers

| Case | Name         | Sequence (5'→3')           | Annealing temperature [°C] | Used for                             |
|------|--------------|----------------------------|----------------------------|--------------------------------------|
| #4   | del(17)_FOR1 | AGGGAAAACCCCAGATACCAAAC    | 60.7                       | primer walking                       |
|      | del(17)_FOR2 | CCCACCACTACTGCTATACCTC     | 62.1                       | primer walking, breakpoint spanning  |
|      | del(17)_FOR3 | TGCATCTCTCTCAACTCAGACC     | 60.3                       | primer walking                       |
|      | del(17)_REV1 | TTGCCATTGATAGGGTAGGGC      | 59.8                       | primer walking, breakpoint spanning  |
|      | del(17)_REV2 | TGCCTACAGTATATTAGGTGAAAGC  | 59.7                       | primer walking                       |
|      | del(17)_REV3 | TGTGGGAAGGGTTTTAGACGC      | 59.8                       | primer walking                       |
| #9   | del(19)_FOR1 | GACCTGACTCAAGCCCCTTC       | 61.4                       | primer walking, break point spanning |
|      | del(19)_FOR2 | GAGTGTTCCTCAGGGCTTCCC      | 61.4                       | primer walking                       |
|      | del(19)_REV1 | CAGGACCCATCGACCACAAA       | 59.4                       | primer walking                       |
|      | del(19)_REV2 | GAGAGGTGGGAAGGAGGGTC       | 63.5                       | primer walking                       |
|      | del(19)_REV3 | GGGTGCCAAGAAAGGGAACCT      | 59.4                       | break point spanning                 |
| #15  | t(2;12)_FOR1 | ATCAGCTTCACCTTGGGTCG       | 59.4                       | primer walking                       |
|      | t(2;12)_FOR2 | CCTATTCTGAGGCTGAATTATGGC   | 61.                        | break point spanning                 |
|      | t(2;12)_REV1 | CAGTGCCCTTCATCCCAT         | 59.4                       | primer walking                       |
|      | t(2;12)_REV2 | ACAAGAGGCAACCCCATCAG       | 59.4                       | break point spanning                 |
| #22  | t(8;12)_FOR1 | TTGAGGGCAGTTGTCAAAGC       | 57.3                       | primer walking                       |
|      | t(8;12)_FOR2 | CTCCTCTCCCCTGCTCTCAT       | 61.4                       | primer walking                       |
|      | t(8;12)_FOR3 | TAATGAGAGACGGCAGCCG        | 58.8                       | primer walking/sequencing            |
|      | t(8;12)_FOR4 | AAATTCCTTAAATGCTCAACAA     | 51.7                       | primer walking/sequencing            |
|      | t(8;12)_FOR5 | ATACAGGTCATAGGCATGCTTTGT   | 59.3                       | primer walking/sequencing            |
|      | t(8;12)_FOR6 | CCAATTCTTGAAAACACTTTTGTGTG | 58.5                       | primer walking/sequencing            |
|      | t(8;12)_FOR7 | TGCACATACATCATCTCGCGT      | 57.90                      | break point spanning                 |
|      | t(8;12)_REV1 | CCTTTCCTGCGTGTGGATGT       | 59.4                       | primer walking                       |
|      | t(8;12)_REV2 | TCTCAAAGCCATCAGCCAG        | 59.4                       | primer walking                       |
|      | t(8;12)_REV3 | AATGTACAATATGTGCTAACT      | 50.6                       | primer walking/sequencing            |
|      | t(8;12)_REV4 | GAGGGCAGGACTCTATGAC        | 61.40                      | primer walking/sequencing            |
|      | t(8;12)_REV5 | CCTCAGATACCTGGGCAGC        | 60.99                      | primer walking/sequencing            |
|      | t(8;12)_REV6 | CACCCATTAACGGAGGACA        | 59.40                      | break point spanning                 |
